# Supplementary material for: Sea Cucumber Holothuria glaberrima High-Quality Genome: new and extended gene families in Holothuroidea
Source: Research Square preprint supplement (doi:10.21203/rs.3.rs-9490613/v1), 2026-05-20
Supplement: Supplementary file 1 [file a165ad9f1176af3a4ebf0f9b.xlsx]

## Sheet: Hg Genomic
Genomic SCRC	Given name	Tree place	Length	SRCR	SR domain	TOTAL SR	PKc-like	EGF	Hyalin Repeat	MAM	Low Density LP-b	Low Density LP-a	CUB	Tryp	Pan/Apple	Krinkle	SAD1/UNC-like	Pro-rich	MFS	Fibronetin	Furin	GiardiaVSP	Hevein/Chitin BD
20015	DMBT1	DMBT	754	none	2	2	1	none	none	none	none	none	none	none	none	none	none	none	none	none	none	none	none
13308	NETR	DMBT	637	none	3	3	none	none	1	none	none	none	none	none	none	none	none	none	none	none	none	none	none
21337	L3BPA	DMBT	166	none	1	1	none	none	none	none	none	none	none	none	none	none	none	none	none	none	none	none	none
13689	DMBT1	DMBT	851	none	6	6	none	none	none	none	none	none	none	none	none	none	none	none	none	none	none	none	none
21349	DMBT1	DMBT	567	none	2	2	none	none	none	none	none	none	none	none	none	none	none	none	1	none	none	none	none
21339	DMBT1	DMBT	982	none	9	9	none	none	none	none	none	none	none	none	none	none	none	none	none	none	none	none	none
4132	DMBT1	DMBT	890	1	4	5	none	none	1	none	none	none	none	none	none	none	none	none	none	none	none	none	none
12660	DMBT1	DMBT	606	none	4	4	none	none	none	none	none	none	none	none	none	none	none	none	none	none	none	none	none
10761	DMBT1	DMBT	724	none	5	5	none	none	none	none	none	none	none	none	none	none	none	none	none	none	none	none	none
21336	NETR	DMBT	490	none	2	2	none	none	none	none	none	none	none	none	none	none	none	none	none	1	none	none	none
15788	DMBT1	DMBT	1483	3	10	13	none	none	none	none	none	none	none	none	none	none	none	none	none	none	none	none	none
19341	DMBT1	DMBT	1260	none	5	5	none	none	none	none	none	none	none	none	none	none	none	none	none	none	2	1	none
21342	DMBT1	DMBT	209	none	2	2	none	none	none	none	none	none	none	none	none	none	none	none	none	none	none	none	none
21340	DMBT1	DMBT	755	none	7	7	none	none	none	none	none	none	none	none	none	none	none	none	none	none	none	none	none
13902	DMBT1	DMBT	1458	none	12	12	none	none	none	none	none	none	none	none	none	none	none	none	none	none	none	none	none
21278	DMBT1	DMBT	1581	none	14	14	none	none	none	none	none	none	none	none	none	none	none	none	none	none	none	none	none
12665	DMBT1	DMBT	615	none	5	5	none	none	none	none	none	none	none	none	none	none	none	none	none	none	none	none	none
12664	DMBT1	DMBT	931	none	7	7	none	none	none	none	none	none	none	none	none	none	none	none	none	none	none	none	none
21210	DMBT1	DMBT	1640	none	7	7	none	none	none	none	none	none	none	none	none	none	none	none	none	none	none	none	11
5065	DMBT1	DMBT	2389	none	23	23	none	none	none	none	none	none	none	none	none	none	none	none	none	none	none	none	none
5064	DMBT1	DMBT	5981	2	49	51	none	1	3	none	none	none	none	none	none	none	none	none	none	none	none	none	none
			1189			8.80952
17082	NETR	NETR	333	none	1	1	none	none	none	none	none	none	none	none	none	none	none	none	none	none	none	none	none
13296	NETR	NETR	636	1	2	3	none	none	none	none	none	none	none	none	none	none	none	none	none	none	none	none	none
24092	DMBT1	NETR	418	none	2	2	none	1	none	none	none	none	none	none	none	none	none	none	none	none	none	none	none
24091	DMBT1	NETR	331	none	1	1	none	1	none	none	none	none	none	none	none	none	none	none	none	none	none	none	none
19665	DMBT1	NETR	349	none	1	1	none	1	none	none	none	none	none	none	none	none	none	none	none	none	none	none	none
5347	NETR	NETR	281	none	1	1	none	1	none	none	none	none	none	none	none	none	none	none	none	none	none	none	none
19619	NETR	NETR	566	none	3	3	none	1	none	none	none	none	none	none	none	none	none	none	none	none	none	none	none
19617	NETR	NETR	243	none	2	2	none	none	none	none	none	none	none	none	none	none	none	none	none	none	none	none	none
14556	DMBT1	NETR	1116	none	4	4	none	none	none	2	1	none	none	none	none	none	none	none	none	none	none	none	none
14116	DMBT1	NETR	534	none	2	2	none	none	none	1	none	none	none	none	none	none	none	none	none	none	none	none	none
21824	NETR	NETR	375	none	2	2	none	none	none	none	none	2	none	none	none	none	none	none	none	none	none	none	none
21823	NETR	NETR	613	none	2	2	none	none	none	none	none	none	2	1	none	none	none	none	none	none	none	none	none
14373	NETR	NETR	1118	none	1	1	none	none	none	none	none	3	none	1	2	1	1	none	none	none	none	none	none
554	NETR	NETR	369	none	3	3	none	none	none	none	none	none	none	none	none	none	none	none	none	none	none	none	none
13708	DMBT1	NETR	369	none	5	5	none	none	none	none	none	none	none	none	none	none	none	1	none	none	none	none	none
13706	DMBT1	NETR	606	1	3	4	none	none	none	none	none	none	none	none	none	none	none	none	none	none	none	none	none
			516.062			2.3125
LO SDE ABAJO ES UN NUEVO ANALISIS HECHO POR AMANDA DONDE SE SEPARAN LAS DMBT DE LAS NEUROTRYPSIN
12660	DMBT1	DMBT	606	none	4	4	none	none	none	none	none	none	none	none	none	none	none	none	none	none	none	none	none
13308	NETR	DMBT	637	none	3	3	none	none	1	none	none	none	none	none	none	none	none	none	none	none	none	none	none
21337	L3BPA	DMBT	166	none	1	1	none	none	none	none	none	none	none	none	none	none	none	none	none	none	none	none	none
4132	DMBT1	DMBT	890	1	4	5	none	none	1	none	none	none	none	none	none	none	none	none	none	none	none	none	none
21349	DMBT1	DMBT	567	none	2	2	none	none	none	none	none	none	none	none	none	none	none	none	1	none	none	none	none
10761	DMBT1	DMBT	724	none	5	5	none	none	none	none	none	none	none	none	none	none	none	none	none	none	none	none	none
13902	DMBT1	DMBT	1458	none	12	12	none	none	none	none	none	none	none	none	none	none	none	none	none	none	none	none	none
21340	DMBT1	DMBT	755	none	7	7	none	none	none	none	none	none	none	none	none	none	none	none	none	none	none	none	none
21336	NETR	DMBT	490	none	2	2	none	none	none	none	none	none	none	none	none	none	none	none	none	1	none	none	none
21339	DMBT1	DMBT	982	none	9	9	none	none	none	none	none	none	none	none	none	none	none	none	none	none	none	none	none
21342	DMBT1	DMBT	209	none	2	2	none	none	none	none	none	none	none	none	none	none	none	none	none	none	none	none	none
12665	DMBT1	DMBT	615	none	5	5	none	none	none	none	none	none	none	none	none	none	none	none	none	none	none	none	none
12664	DMBT1	DMBT	931	none	7	7	none	none	none	none	none	none	none	none	none	none	none	none	none	none	none	none	none
15788	DMBT1	DMBT	1483	3	10	13	none	none	none	none	none	none	none	none	none	none	none	none	none	none	none	none	none
21278	DMBT1	DMBT	1581	none	14	14	none	none	none	none	none	none	none	none	none	none	none	none	none	none	none	none	none
17082	NETR	NETR	333	none	1	1	none	none	none	none	none	none	none	none	none	none	none	none	none	none	none	none	none
13296	NETR	NETR	636	1	2	3	none	none	none	none	none	none	none	none	none	none	none	none	none	none	none	none	none
19341	DMBT1	DMBT	1260	none	5	5	none	none	none	none	none	none	none	none	none	none	none	none	none	none	2	1	none
21210	DMBT1	DMBT	1640	none	7	7	none	none	none	none	none	none	none	none	none	none	none	none	none	none	none	none	11
20015	DMBT1	DMBT	754	none	2	2	1	none	none	none	none	none	none	none	none	none	none	none	none	none	none	none	none
554	NETR	NETR	369	none	3	3	none	none	none	none	none	none	none	none	none	none	none	none	none	none	none	none	none
13708	DMBT1	NETR	369	none	5	5	none	none	none	none	none	none	none	none	none	none	none	1	none	none	none	none	none
13706	DMBT1	NETR	606	1	3	4	none	none	none	none	none	none	none	none	none	none	none	none	none	none	none	none	none
13689	DMBT1	DMBT	851	none	6	6	none	none	none	none	none	none	none	none	none	none	none	none	none	none	none	none	none
5065	DMBT1	DMBT	2389	none	23	23	none	none	none	none	none	none	none	none	none	none	none	none	none	none	none	none	none
5064	DMBT1	DMBT	5981	2	49	51	none	1	3	none	none	none	none	none	none	none	none	none	none	none	none	none	none
19665	DMBT1	NETR	349	none	1	1	none	1	none	none	none	none	none	none	none	none	none	none	none	none	none	none	none
			1023.37			7.48148
14373	NETR	NETR	1118	none	1	1	none	none	none	none	none	3	none	1	2	1	1	none	none	none	none	none	none
24092	DMBT1	NETR	418	none	2	2	none	1	none	none	none	none	none	none	none	none	none	none	none	none	none	none	none
24091	DMBT1	NETR	331	none	1	1	none	1	none	none	none	none	none	none	none	none	none	none	none	none	none	none	none
5347	NETR	NETR	281	none	1	1	none	1	none	none	none	none	none	none	none	none	none	none	none	none	none	none	none
21824	NETR	NETR	375	none	2	2	none	none	none	none	none	2	none	none	none	none	none	none	none	none	none	none	none
21823	NETR	NETR	613	none	2	2	none	none	none	none	none	none	2	1	none	none	none	none	none	none	none	none	none
14556	DMBT1	NETR	1116	none	4	4	none	none	none	2	1	none	none	none	none	none	none	none	none	none	none	none	none
14116	DMBT1	NETR	534	none	2	2	none	none	none	1	none	none	none	none	none	none	none	none	none	none	none	none	none
19619	NETR	NETR	566	none	3	3	none	1	none	none	none	none	none	none	none	none	none	none	none	none	none	none	none
19617	NETR	NETR	243	none	2	2	none	none	none	none	none	none	none	none	none	none	none	none	none	none	none	none	none
			559.5			2

## Sheet: Reference
Reference	Given name	Length	SRCR	SR domain	TOTAL SR	PKc-like	EGF	Hyalin Repeat	MAM	Low Density LP-b	Low Density LP-a	CUB	Tryp	Pan/Apple	Krinkle	SAD1/UNC-like	Pro-rich	MFS	Fibronetin	Furin	GiardiaVSP	Hevein/Chitin BD	Zona pellucida	F5/8-discoidin	Atrophin
DMBT1Hsap KA12557538	DMBT1	1149	none	4	4	none	none	none	none	none	none	2	none	none	none	none	none	none	none	none	none	none	1	none	none
DMBT1 Mmusc NP001334561	DMBT1	1984	none	7	7	none	none	none	none	none	none	5	none	none	none	none	none	none	none	none	none	none	1	none	none
DMBT1Htran XP046870499	DMBT1	2520	none	16	16	none	none	none	none	none	none	?	none	none	none	none	none	none	none	none	none	none	1	none	none
DMBT1Pmin XP038061741	DMBT1	2095	none	16	16	none	none	none	none	none	none	none	none	none	none	none	none	none	none	none	none	none	none	none	none
SCRC12 UPPmini XP038062134	SCRC12	5436	none	40	40	none	none	none	none	none	none	none	none	none	none	none	none	none	none	none	none	none	none	4	none
DMBT1Arube XP033636524	DMBT1	1550	none	14	14	none	none	none	none	none	none	none	none	none	none	none	none	none	none	none	none	none	none	none	none
DMBT1Aplan XP022087751	DMBT1	3089	none	27	27	none	none	none	none	none	none	none	none	none	none	none	none	none	none	none	none	none	none	none	none
SCRC12Spurp NP999762	SCRC12	2183	none	20	20	none	none	none	none	none	none	none	none	none	none	none	none	none	none	none	none	none	none	none	none
DMBT1Ajap XP033106180	DMBT1	2274	none	17	17	none	11	none	none	none	none	none	none	none	none	none	none	none	none	none	none	none	none	none	none
DMBT1Spurp XP030834721	DMBT1	616	none	5	5	none	none	none	none	none	none	none	none	none	none	none	none	none	none	none	none	none	none	none	none
DMBT1Lvari XP414471811	DMBT1	2596	none	22	22	none	none	none	none	none	none	none	none	none	none	none	none	none	none	none	none	none	none	none	none
		2317.45		17.0909	17.0909
NTPDMBT1PL Ajap PIK42104	NETR	759	none	5	5	none	none	none	none	none	none	none	none	none	none	none	none	none	none	none	none	none	none	none	1
NTPfasc OPJ84559	NETR	833	1	3	4	none	none	none	none	none	none	none	1	none	1	none	none	none	none	none	none	none	none	none	none
NTIX2CliviXP005500125	NETR	833	1	3	4	none	none	none	none	none	none	none	1	none	none	none	none	none	none	none	none	none	none	none	none
NTIX1Ggall XP015143816	NETR	832	none	3	3	none	none	none	none	none	none	none	1	none	1	none	none	none	none	none	none	none	none	none	none
NTIX4Cplag XP043535017	NETR	679	none	4	4	none	none	none	none	none	none	none	1	none	1	none	none	none	none	none	none	none	none	none	none
NTIX5Ccarc XP041031978	NETR	714	none	4	4	none	none	none	none	none	none	none	1	none	none	none	none	none	none	none	none	none	none	none	none
NTMmusc NP032965	NETR	771	none	3	3	none	none	none	none	none	none	none	1	none	1	none	none	none	none	none	none	none	none	none	none
NTIXSpuirp XP030831393	NETR	602	none	3	3	none	none	none	none	none	none	none	none	none	none	none	none	none	none	none	none	none	none	none	1
SCRC12Rphil AYM55817	SCRC12	141	none	1	1	none	none	none	none	none	none	none	none	none	none	none	none	none	none	none	none	none	none	none	none
		684.889		3.22222	3.44444

## Sheet: FINAL TABLE
12660	DMBT1	DMBT	606	none	4	4	none	none	none	none	none	none	none	none	none	none	none	none	none	none	none	none	none
13308	NETR	DMBT	637	none	3	3	none	none	1	none	none	none	none	none	none	none	none	none	none	none	none	none	none
21337	L3BPA	DMBT	166	none	1	1	none	none	none	none	none	none	none	none	none	none	none	none	none	none	none	none	none
4132	DMBT1	DMBT	890	1	4	5	none	none	1	none	none	none	none	none	none	none	none	none	none	none	none	none	none
21349	DMBT1	DMBT	567	none	2	2	none	none	none	none	none	none	none	none	none	none	none	none	1	none	none	none	none
10761	DMBT1	DMBT	724	none	5	5	none	none	none	none	none	none	none	none	none	none	none	none	none	none	none	none	none
13902	DMBT1	DMBT	1458	none	12	12	none	none	none	none	none	none	none	none	none	none	none	none	none	none	none	none	none
21340	DMBT1	DMBT	755	none	7	7	none	none	none	none	none	none	none	none	none	none	none	none	none	none	none	none	none
21336	NETR	DMBT	490	none	2	2	none	none	none	none	none	none	none	none	none	none	none	none	none	1	none	none	none
21339	DMBT1	DMBT	982	none	9	9	none	none	none	none	none	none	none	none	none	none	none	none	none	none	none	none	none
21342	DMBT1	DMBT	209	none	2	2	none	none	none	none	none	none	none	none	none	none	none	none	none	none	none	none	none
12665	DMBT1	DMBT	615	none	5	5	none	none	none	none	none	none	none	none	none	none	none	none	none	none	none	none	none
12664	DMBT1	DMBT	931	none	7	7	none	none	none	none	none	none	none	none	none	none	none	none	none	none	none	none	none
15788	DMBT1	DMBT	1483	3	10	13	none	none	none	none	none	none	none	none	none	none	none	none	none	none	none	none	none
21278	DMBT1	DMBT	1581	none	14	14	none	none	none	none	none	none	none	none	none	none	none	none	none	none	none	none	none
17082	NETR	NETR	333	none	1	1	none	none	none	none	none	none	none	none	none	none	none	none	none	none	none	none	none
13296	NETR	NETR	636	1	2	3	none	none	none	none	none	none	none	none	none	none	none	none	none	none	none	none	none
19341	DMBT1	DMBT	1260	none	5	5	none	none	none	none	none	none	none	none	none	none	none	none	none	none	2	1	none
21210	DMBT1	DMBT	1640	none	7	7	none	none	none	none	none	none	none	none	none	none	none	none	none	none	none	none	11
20015	DMBT1	DMBT	754	none	2	2	1	none	none	none	none	none	none	none	none	none	none	none	none	none	none	none	none
554	NETR	NETR	369	none	3	3	none	none	none	none	none	none	none	none	none	none	none	none	none	none	none	none	none
13708	DMBT1	NETR	369	none	5	5	none	none	none	none	none	none	none	none	none	none	none	1	none	none	none	none	none
13706	DMBT1	NETR	606	1	3	4	none	none	none	none	none	none	none	none	none	none	none	none	none	none	none	none	none
13689	DMBT1	DMBT	851	none	6	6	none	none	none	none	none	none	none	none	none	none	none	none	none	none	none	none	none
5065	DMBT1	DMBT	2389	none	23	23	none	none	none	none	none	none	none	none	none	none	none	none	none	none	none	none	none
5064	DMBT1	DMBT	5981	2	49	51	none	1	3	none	none	none	none	none	none	none	none	none	none	none	none	none	none
19665	DMBT1	NETR	349	none	1	1	none	1	none	none	none	none	none	none	none	none	none	none	none	none	none	none	none
			1023.37			7.48148
14373	NETR	NETR	1118	none	1	1	none	none	none	none	none	3	none	1	2	1	1	none	none	none	none	none	none
24092	DMBT1	NETR	418	none	2	2	none	1	none	none	none	none	none	none	none	none	none	none	none	none	none	none	none
24091	DMBT1	NETR	331	none	1	1	none	1	none	none	none	none	none	none	none	none	none	none	none	none	none	none	none
5347	NETR	NETR	281	none	1	1	none	1	none	none	none	none	none	none	none	none	none	none	none	none	none	none	none
21824	NETR	NETR	375	none	2	2	none	none	none	none	none	2	none	none	none	none	none	none	none	none	none	none	none
21823	NETR	NETR	613	none	2	2	none	none	none	none	none	none	2	1	none	none	none	none	none	none	none	none	none
14556	DMBT1	NETR	1116	none	4	4	none	none	none	2	1	none	none	none	none	none	none	none	none	none	none	none	none
14116	DMBT1	NETR	534	none	2	2	none	none	none	1	none	none	none	none	none	none	none	none	none	none	none	none	none
19619	NETR	NETR	566	none	3	3	none	1	none	none	none	none	none	none	none	none	none	none	none	none	none	none	none
19617	NETR	NETR	243	none	2	2	none	none	none	none	none	none	none	none	none	none	none	none	none	none	none	none	none
			559.5			2
